# Supplementary material for: Cross-talk between phosphorylation and lysine acetylation in a genome-reduced bacterium
Source: PubMed Central journal article supplement — Mol Syst Biol. 2012 Feb 28;8:571. doi: 10.1038/msb.2012.4 (PMC3293634; doi:10.1038/msb.2012.4), 2012-02-28
Supplement: msb20124-s1.pdf [file msb20124-s1.pdf]

## SUPPLEMENTARY INFORMATION

### Cross-talk between phosphorylation and lysine acetylation in a genome-reduced bacterium.

Vera van Noort<sup>1‡</sup>, Jan Seebacher<sup>1‡</sup>, Samuel Bader<sup>1‡</sup>, Shabaz Mohammed<sup>2</sup>, Ivana Vonkova<sup>1</sup>, Matthew J. Betts<sup>3</sup>, Sebastian Kühner<sup>1</sup>, Runjun Kumar<sup>1</sup>, Tobias Maier<sup>4</sup>, Martina O’Flaherty<sup>2</sup>, Vladimir Rybin<sup>1</sup>, Arne Schmeisky<sup>5</sup>, Eva Yus<sup>4</sup>, Jörg Stülke<sup>5</sup>, Luis Serrano<sup>4,6</sup>, Robert B. Russell<sup>3</sup>, Albert J.R. Heck<sup>2</sup>, Peer Bork<sup>1\*</sup> and Anne-Claude Gavin<sup>1\*</sup>

<sup>1</sup>Structural and Computational Biology Unit, European Molecular Biology Laboratory, EMBL, Heidelberg, Germany.

<sup>2</sup>Biomolecular Mass Spectrometry and Proteomics, Bijvoet Center for Biomolecular Research and Institute for Pharmaceutical Sciences, Utrecht University, 3584 CH Utrecht, The Netherlands.

<sup>3</sup>Cell Networks, University of Heidelberg, D-69120 Heidelberg, Germany.

<sup>4</sup>EMBL/CRG Systems Biology Research Unit, Centre for Genomic Regulation (CRG) and UPF, Dr. Aiguader 88, 08003 Barcelona, Spain.

<sup>5</sup>Department of General Microbiology, Georg-August University Göttingen, D-37077 Göttingen, Germany.

<sup>6</sup>ICREA, Pg. Lluís Companys 23, 08010 Barcelona, Spain.

‡ These authors contributed equally to the work

\* *To whom correspondence should be addressed.* E-mail: [gavin@embl.de](mailto:gavin@embl.de) and [bork@embl.de](mailto:bork@embl.de)

## **Table of Content**

|                          |         |
|--------------------------|---------|
| Supplementary text       | page 3  |
| Supplementary references | page 4  |
| Supplementary Figure 1   | page 5  |
| Supplementary Figure 2   | page 6  |
| Supplementary Figure 3   | page 7  |
| Supplementary Figure 4   | page 8  |
| Supplementary Figure 5   | page 9  |
| Supplementary Figure 6   | page 10 |
| Supplementary Figure 7   | page 11 |
| Supplementary Figure 8   | page 12 |
| Supplementary Figure 9   | page 13 |
| Supplementary Figure 10  | page 14 |

## Supplementary text

Among the proteins that show complex patterns of PTMs, we found many structural proteins and chaperones (Fig.2B and Supplementary Table 1). For example, the translational GTPase EF-Tu (Tuf, Mpn665) associates with many protein complexes in *M. pneumoniae* (Kuhner et al, 2009) and has been proposed to act as a cytoskeletal factor involved in cell shape maintenance (Defeu Soufo et al, 2010) and adhesion to extracellular matrix of epithelial cells (Balasubramanian et al, 2009). We found two phosphorylation and 12 lysine acetylations for EF-Tu (Fig. 2C and Supplementary Table 1), including a conserved Thr383 located within its carboxy-terminal domain that is required for adhesion. Such extensive pattern of modification may account for EF-Tu multi-functionality and may be important for *M. pneumoniae* pathogenicity.

Eight of nine protein chaperones in *M. pneumoniae*, were lysine acetylated and four carried additional phosphorylation sites (Fig. 2A; COG class O). For example eight acetyl lysines were characterized for ClpB that localize in the substrate-binding (K286, K323, K368) and -discriminating (K28) domains and two regions, NBD1 (K191) and NBD2 (K417, K561), responsible for ClpB hexamer oligomerization. This suggests that lysine acetylation exerts pleiotropic effect on chaperonin activity, reminiscent of the complex regulation observed for the eukaryotic chaperone Hsp90 (Scroggins et al, 2007).

Four proteins of previously unknown functions, Mpn256, Mpn387, Mpn400 and Mpn454, cluster together with the sets of cytoadherence proteins that are downregulated upon PknB (Mpn248) deletion (Supplementary Fig. 5). Consistent with a possible role in cell adhesion, both Mpn400 and Mpn454 have predicted transmembrane domains. Furthermore, *mpn454* belongs to the same operon as the known cytoadherence proteins Hmw3 (Mpn452) and P30 (Mpn453) and Mpn400 was found to copurify in the Triton X100 insoluble fraction together with other cytoskeletal proteins (Regula et al, 2001). Also, genetic studies suggested a role for Mpn387 in maintenance of the attachment organelle and gliding motility (Hasselbring et al, 2006).

## Supplementary references

- Balasubramanian S, Kannan TR, Hart PJ, Baseman JB (2009). Amino acid changes in elongation factor Tu of *Mycoplasma pneumoniae* and *Mycoplasma genitalium* influence fibronectin binding. *Infect Immun* 77: 3533-3541
- Defeu Soufo HJ, Reimold C, Linne U, Knust T, Gescher J, Graumann PL (2010). Bacterial translation elongation factor EF-Tu interacts and colocalizes with actin-like MreB protein. *Proc Natl Acad Sci U S A* 107: 3163-3168
- Hasselbring BM, Page CA, Sheppard ES, Krause DC (2006). Transposon mutagenesis identifies genes associated with *Mycoplasma pneumoniae* gliding motility. *J Bacteriol* 188: 6335-6345
- Kuhner S, van Noort V, Betts MJ, Leo-Macias A, Batisse C, Rode M, Yamada T, Maier T, Bader S, Beltran-Alvarez P, Castano-Diez D, Chen WH, Devos D, Guell M, Norambuena T, Racke I, Rybin V, Schmidt A, Yus E, Aebersold R, et al. (2009). Proteome organization in a genome-reduced bacterium. *Science* 326: 1235-1240
- Regula JT, Boguth G, Gorg A, Hegermann J, Mayer F, Frank R, Herrmann R (2001). Defining the mycoplasma 'cytoskeleton': the protein composition of the Triton X-100 insoluble fraction of the bacterium *Mycoplasma pneumoniae* determined by 2-D gel electrophoresis and mass spectrometry. *Microbiology* 147: 1045-1057
- Scroggins BT, Robzyk K, Wang D, Marcu MG, Tsutsumi S, Beebe K, Cotter RJ, Felts S, Toft D, Karnitz L, Rosen N, Neckers L (2007). An acetylation site in the middle domain of Hsp90 regulates chaperone function. *Mol Cell* 25: 151-159

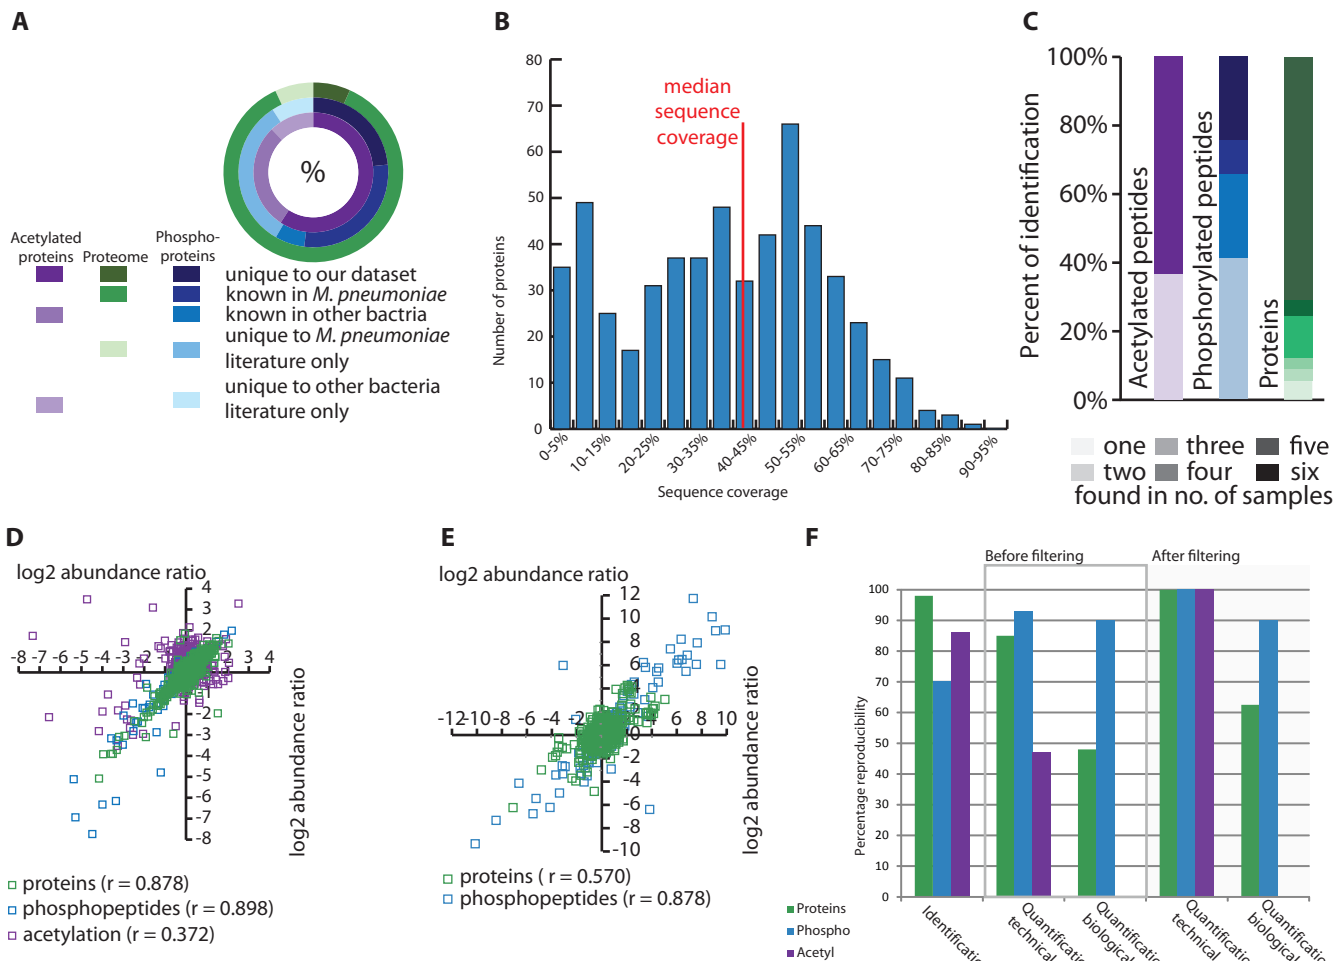

**Supplementary Figure 1 | Quality measure of the dataset.** **A)** the fraction of the proteins unique to our dataset, unique to the literature, either found in *Mycoplasma pneumoniae* or in other bacteria, and the overlap between the literature and our dataset. **B)** shows the distribution of the sequence coverage of the identified proteins including the median of the sequence coverage. **C)** shows the distribution in how many sample the lysine-acetylated peptide, the phosphorylated peptide or identified proteins. Only two samples were enriched for lysine-acetylated peptides, four samples were used for phosphoproteome analysis and all six samples were used for protein identification. The correlation between quantification between technical duplicates (panel **D**) and biological duplicates (panel **E**) for lysine acetylated, phosphorylated peptides and quantified proteins. **F)** Reproducibility of identifications of proteins and peptides between mixes with the same k.o. strains (mixed biological and technical duplicates) and up- and down-regulation of technical duplicates (same culture samples with swapped labels) and biological duplicates (different culture samples). If technical duplicates of quantifications were available, only those were both ratios are in the same direction, above the threshold and significant are considered in the final table of regulated proteins/peptides. Thus technical reproducibility after filtering is 100%, biological reproducibility after this filtering of up-/down-regulations is higher than before filtering.

**A**

| Systematic name                            | Mpn 003 | Mpn 024 | Mpn 067 | Mpn 191 | Mpn 300 | Mpn 312 | Mpn 322 | Mpn 324 | Mpn 331 | Mpn 397 | Mpn 429 | Mpn 504 | Mpn 516 | Mpn 606 | Mpn 665 |
|--------------------------------------------|---------|---------|---------|---------|---------|---------|---------|---------|---------|---------|---------|---------|---------|---------|---------|
| Protein name                               | GyrB    | RpoE    | Mpn 067 | RpoA    | ScpA    | Mpn 312 | NrdF    | NrdE    | Tig     | SpoT    | Pgk     | Mpn 504 | RpoB    | Eno     | Tuf     |
| Molecular weight [kDa]                     | 73      | 17      | 36      | 37      | 60      | 24      | 40      | 82      | 51      | 86      | 44      | 15      | 156     | 49      | 43      |
| identified acetylated by MS/MS             | Green   | Green   | Green   | Green   | Red     | Green   | Green   | Green   | Green   | Green   | Green   | Red     | Green   | Green   | Green   |
| identified acetylated in WesternBlot       | Green   | Green   | Green   | Red     | Green   | Red     | Green   | Green   | Green   | Green   | Red     | Red     | Red     | Green   | Green   |
| identified purified protein (α-CBP signal) | Green   | Green   | Green   | weak    | Green   | Green   | Green   | Green   | Green   | Green   | Red     | Red     | Red     | Green   | Green   |

detected    not detected

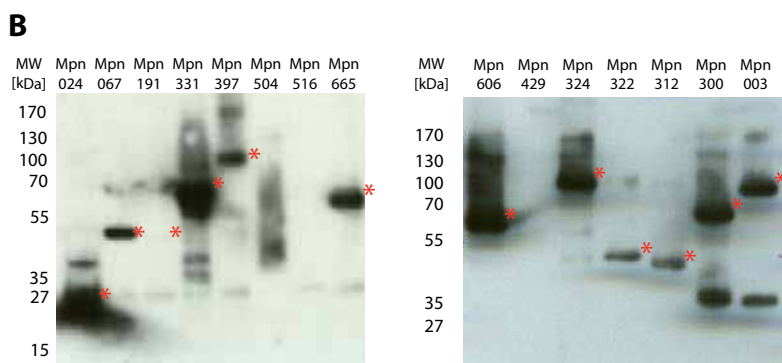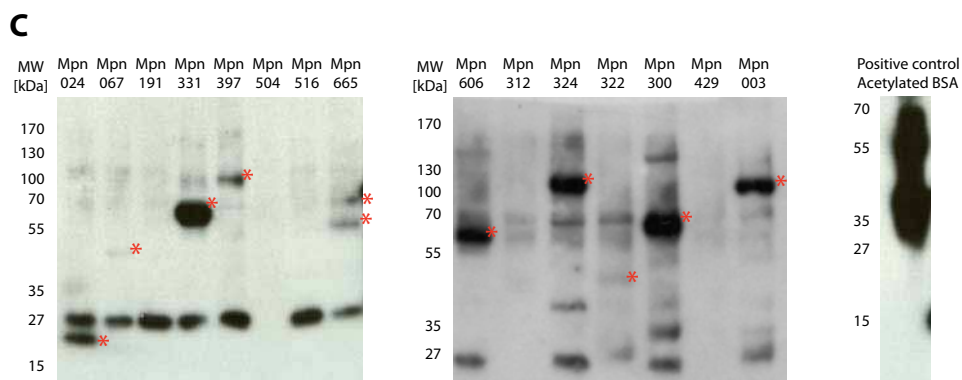

**Supplementary Figure 2 | Validation of acetylated proteins by Western Blot.** **A)** Result matrix of validation experiments. The columns give the systematic name, protein name and the molecular weight (MW) of each validation candidate. There color coded matrix rows below the validation candidate names indicate, whether a protein was (i) identified as being acetylated in the mass-spectrometric analysis, (ii) identified being acetylated by Western blot and (iii) identified being purified prior to Western blot acetlylation analysis. Green indicates a detected signal, red represents no detected signal. **B)** is Western blot raw data supporting the detection of the affinity purified validation candidate proteins via an α-calmodulin binding peptide antibody. **C)** is Western blot raw data supporting the detection of the acetylated validation candidate proteins via an α-acetyllysine antibody. As positive control a Western blot of acetylated bovine serum albumin detected via the α-acetyllysine antibody is shown.

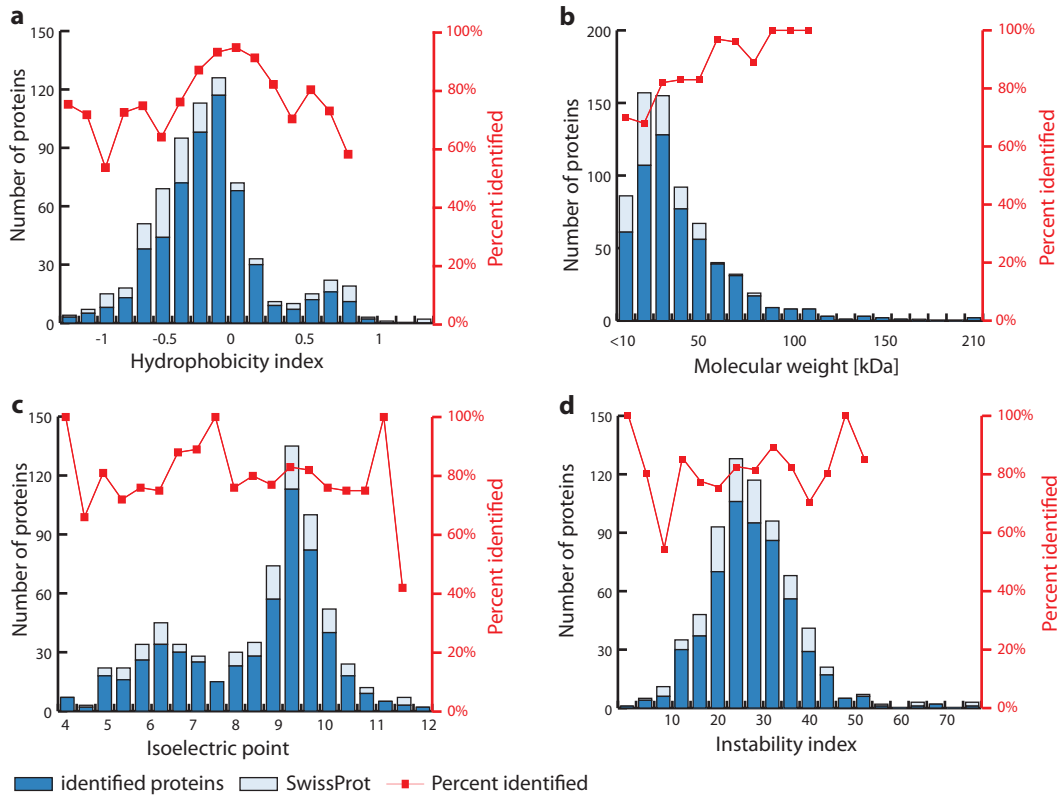

**Supplementary Figure 3 | The protein identification has not bias for physio-chemical properties such as isoelectric point (panel a), hydrophobicity (panel b), molecular weight (panel c) and instability index (panel d).** The identified proteins (dark blue) are compared to the *M. pneumoniae* proteins annotated in SwissProt. Each parameter was calculated for each protein using the protparam tool from ExPASy (<http://www.expasy.ch/tools/protparam.html>) and binned into 20 equally sized ranges. Identified proteins are shown in dark blue, in SwissProt annotated proteins in light blue. The red line indicated the coverage in each bin.

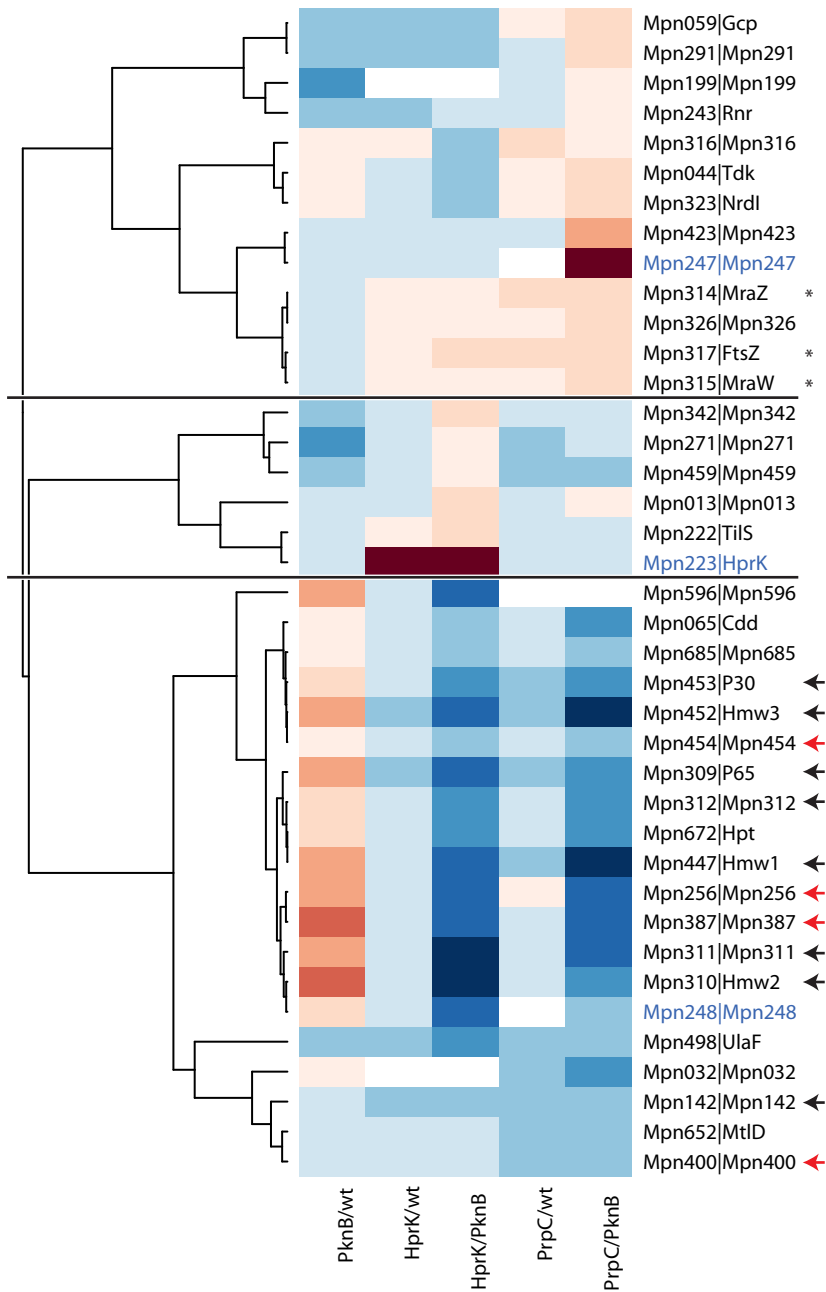

**Supplementary Figure 4 | Clustering of protein abundance changes reveals new cytodherence proteins and functional implications of PrpC in cell cycle.** The regulated proteins were clustered according to their relative abundance changes between the different strains. We propose four uncharacterized proteins (red arrows), which cluster together with the known cytodherence proteins (black arrows), to be involved in cytodherence. Proteins with a function related to the cell cycle (asterisk) cluster together with the PrpC, suggesting that these proteins are downregulated in *prpC* k.o. strain. The enzymes, which are depleted in either of the strains, are shown in blue.

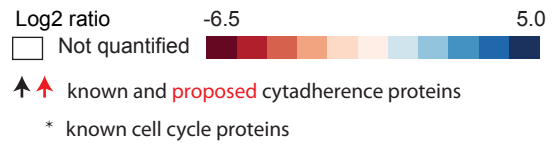



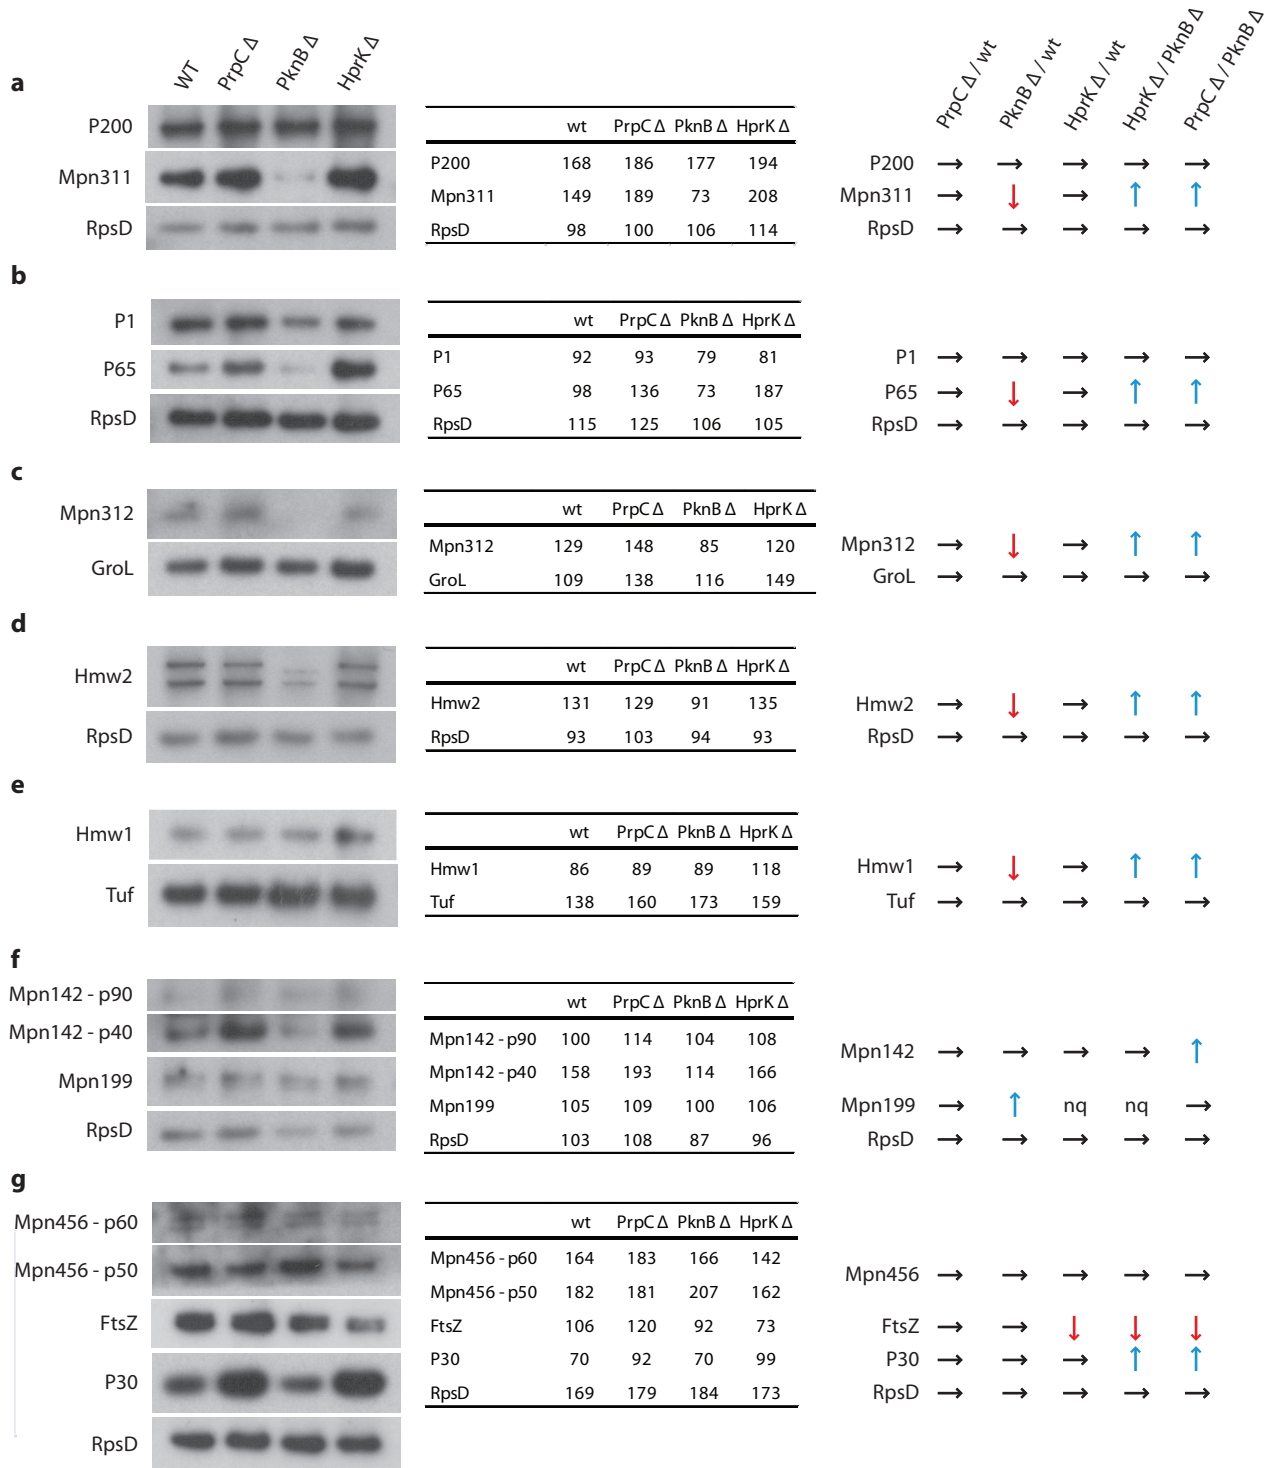

**Supplementary Figure 5 | Validation of protein abundance changes by western blot.** In each of the panel the signals from western blot membrane, the quantification of the western blot signals and the regulation expected from mass spectrometric data (Supplementary table 1) are shown. The proteins analyzed were **a**, P200 (Mpn567), Mpn311 and RpsD(Mpn446), **b**, P1 (Mpn141), P65 (Mpn309) and RpsD (Mpn446), **c**, Mpn312 and GroL (Mpn573), **d**, Hmw2 (Mpn310) and RpsD (Mpn446), **e**, Hmw1 (Mpn447) and Tuf (Mpn665), **f**, the two cleavage products of Mpn142, Mpn199 and RpsD (Mpn446), **g**, Mpn456, FtsZ (Mpn317), P30 (Mpn453) and RpsD (Mpn446).

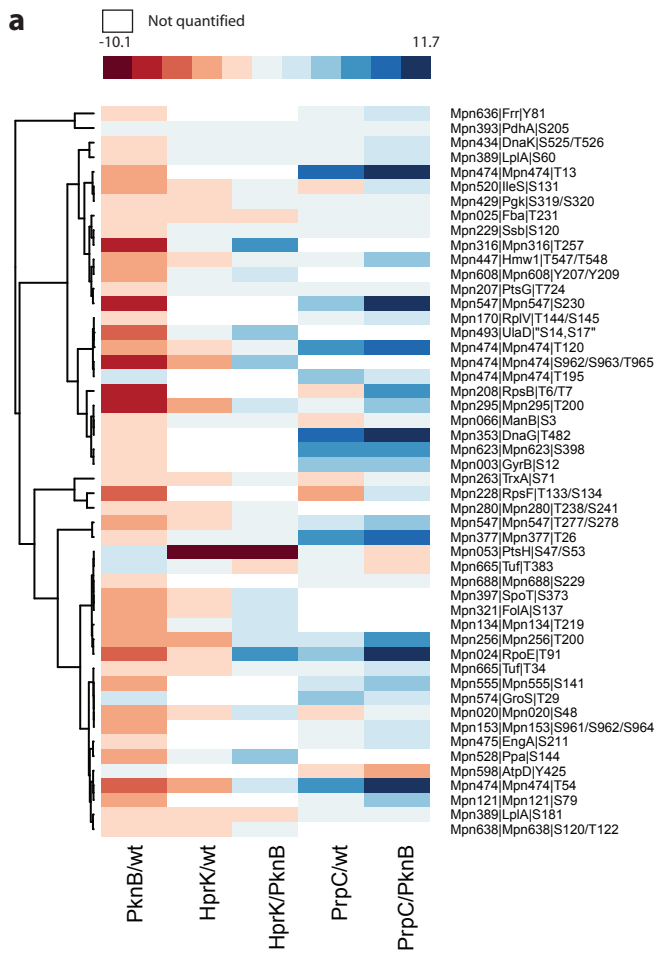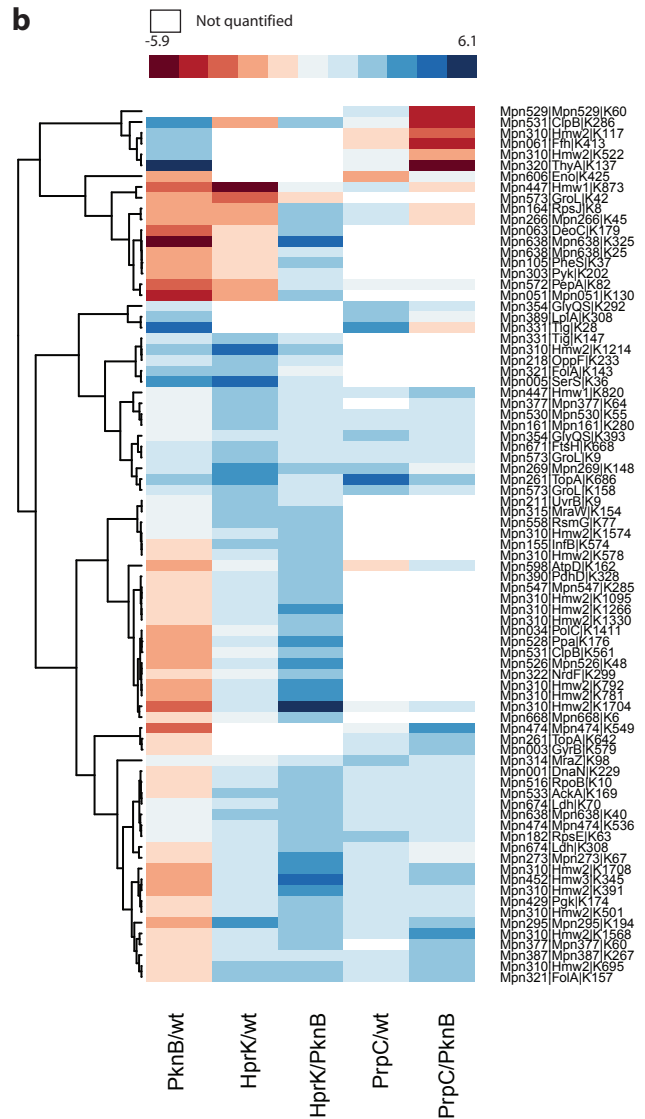

**Supplementary Figure 6 | Clustering of phospho and acetyl-K sites.** Only regulated sites were selected for clustering. Clustering was done with uncentered correlation and hclust as implemented in R. A clustering of phosphosites, B clustering of acetyl-K sites.

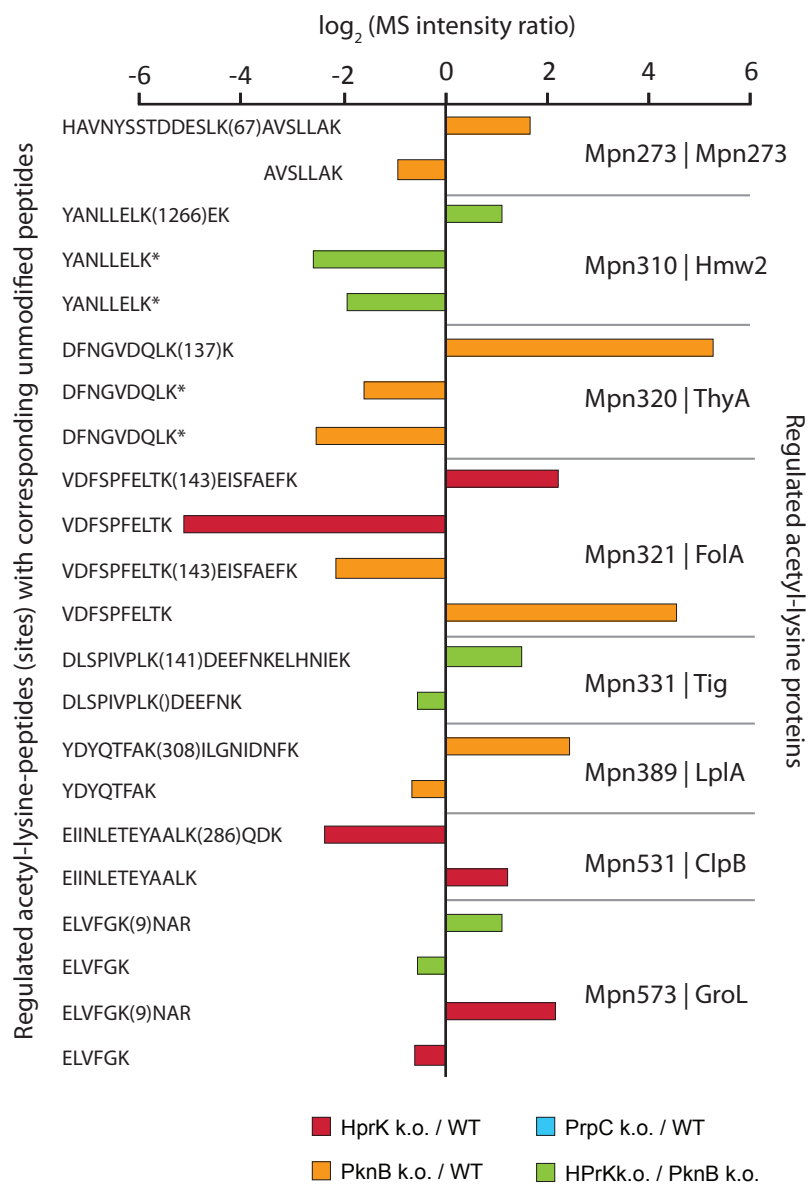

xxxxxxxxxxK(ac)xxxxxxx ↑ up-regulated acetyl-lysine peptide (site)  
 xxxxxxxxxxK ↓ xxxxxxxx ↓ corresponding down-regulated unmodified peptides  
 \* technical/biological replicates of the same strain-to-strain comparison

**Supplementary Figure 7 | Validation of regulated acetyl-lysine sites by quantitative MS.** Sets of corresponding acetyl-lysine/ unmodified peptides for nine acetyl-proteins with regulated acetyl-lysine sites in the different strains, with peptide sequences flanking the site, validated by regulation in opposite directions by  $\log_2$ (MS intensity ratios).

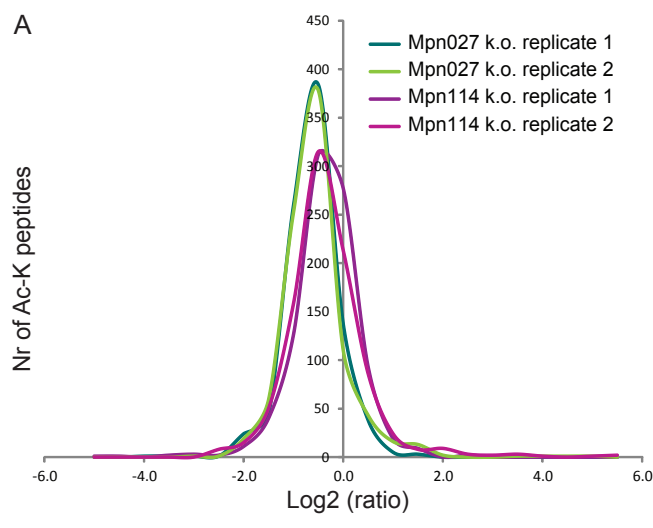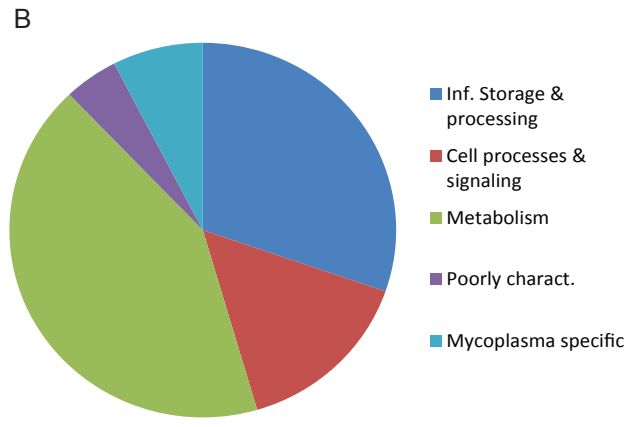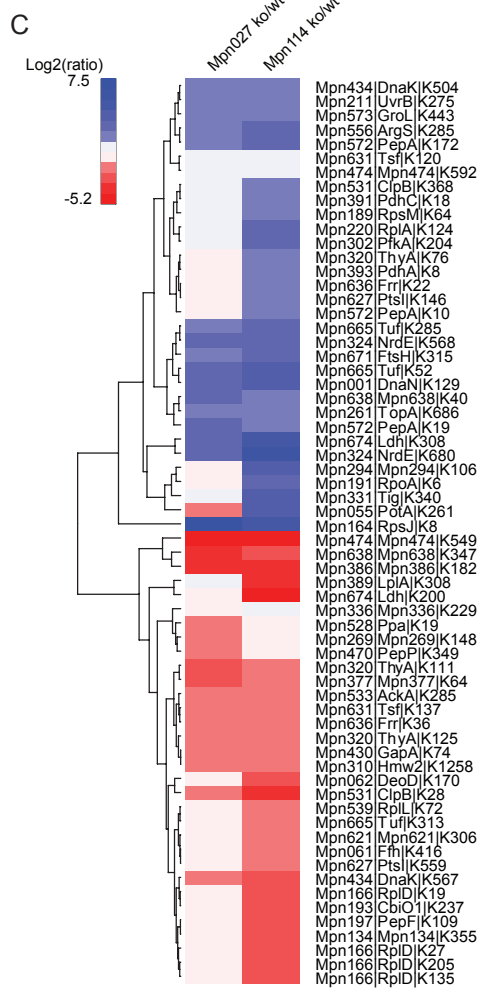

**Supplementary Figure 8 | Characterization of acetylated lysines in acetyl-lysine k.o. strains.**

**A)** Distribution of protein weighted average normalized log<sub>2</sub>-ratios of acetylated peptides that have been quantified in both replicate experiments. **B)** Distribution of functional classifications of acetylated sites classified as regulated in acetylase k.o. strains. **C)** Heatmap of protein weighted average normalized log<sub>2</sub> ratios of regulated acetylated lysine sites in the two acetylase k.o. strains.

**A** GroS RplA

Experiment 1

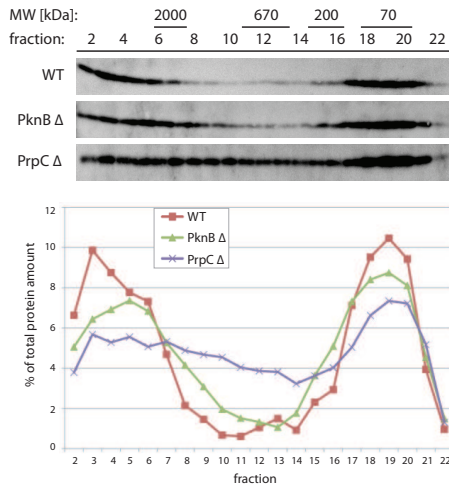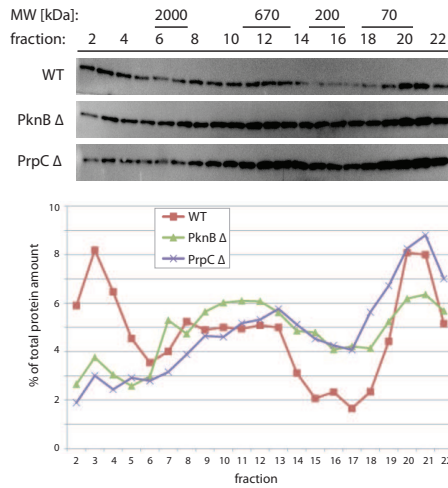

Experiment 2

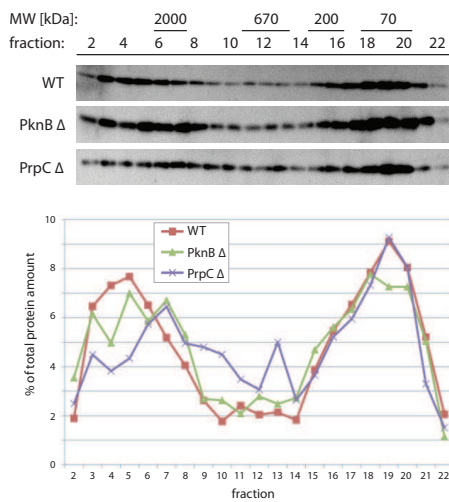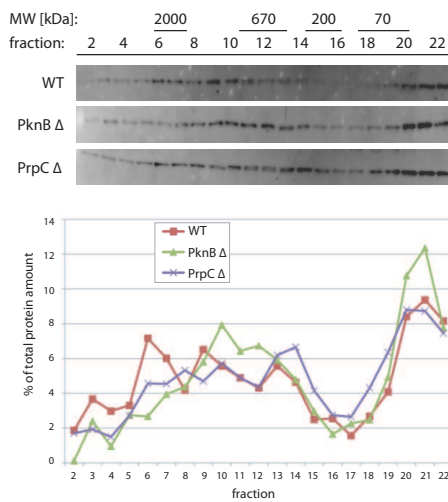

Experiment 3

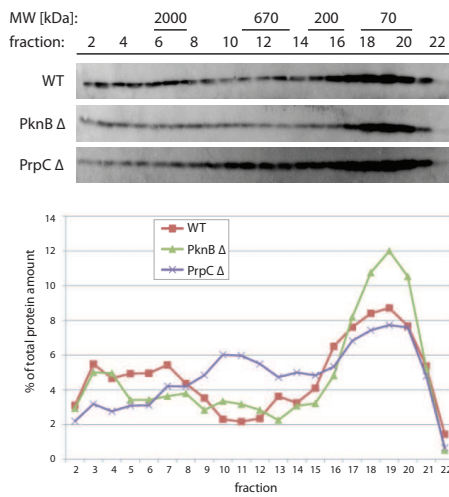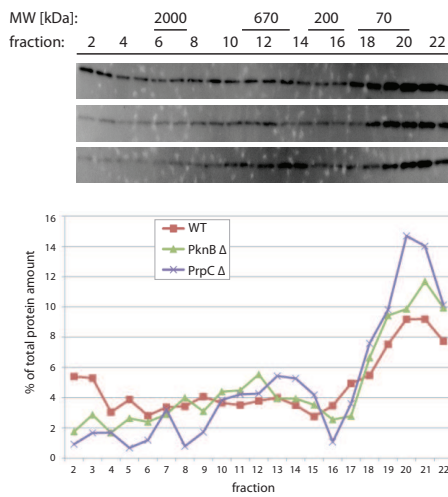

**B** GroS RplA

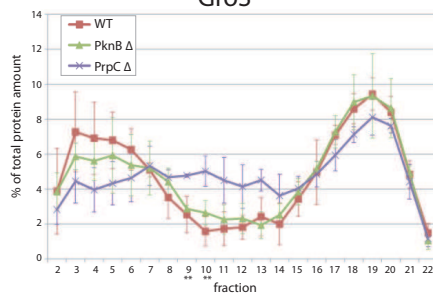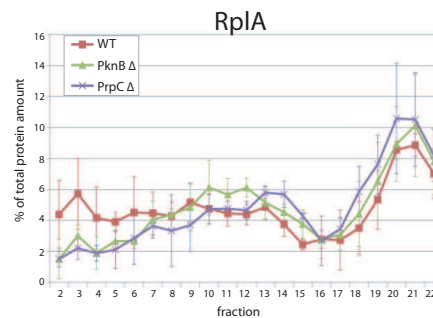

**Supplementary Figure 9 | Sedimentation of GroS and RplA on sucrose gradients. A)**

Lysis of samples from wt, PknB ko and PrpC ko was performed by supplementing the lysis buffer with the deacetylase inhibitors nicotinamid (10 mM) and butyric acid (50 mM). Volume of 30  $\mu$ l of samples were layered on a top of 4 ml sucrose gradient (10-35%) and separated by 14 hours centrifugation at 130 000 g at 4°C. The gradient was subsequently divided into 22 fractions per 165  $\mu$ l. Fractions were analyzed by SDS-PAGE and western blot. Polyclonal antibodies were used to detect the GroS protein (Mpn574) and as negative control 50S ribosomal protein RplA (Mpn220); final detection was done using secondary antibodies. Band intensities were normalized for equal sample loading and in each fraction the percentage of total protein amounts of the total sample was calculated. **B)** Averages and sd's were calculated over three independent sucrose gradient separation experiments. We observed a significant difference ( $p < 0.01$ ) of GroS in fractions 9 and 10 between wt and PrpC ko. No significant differences were found for RplA.

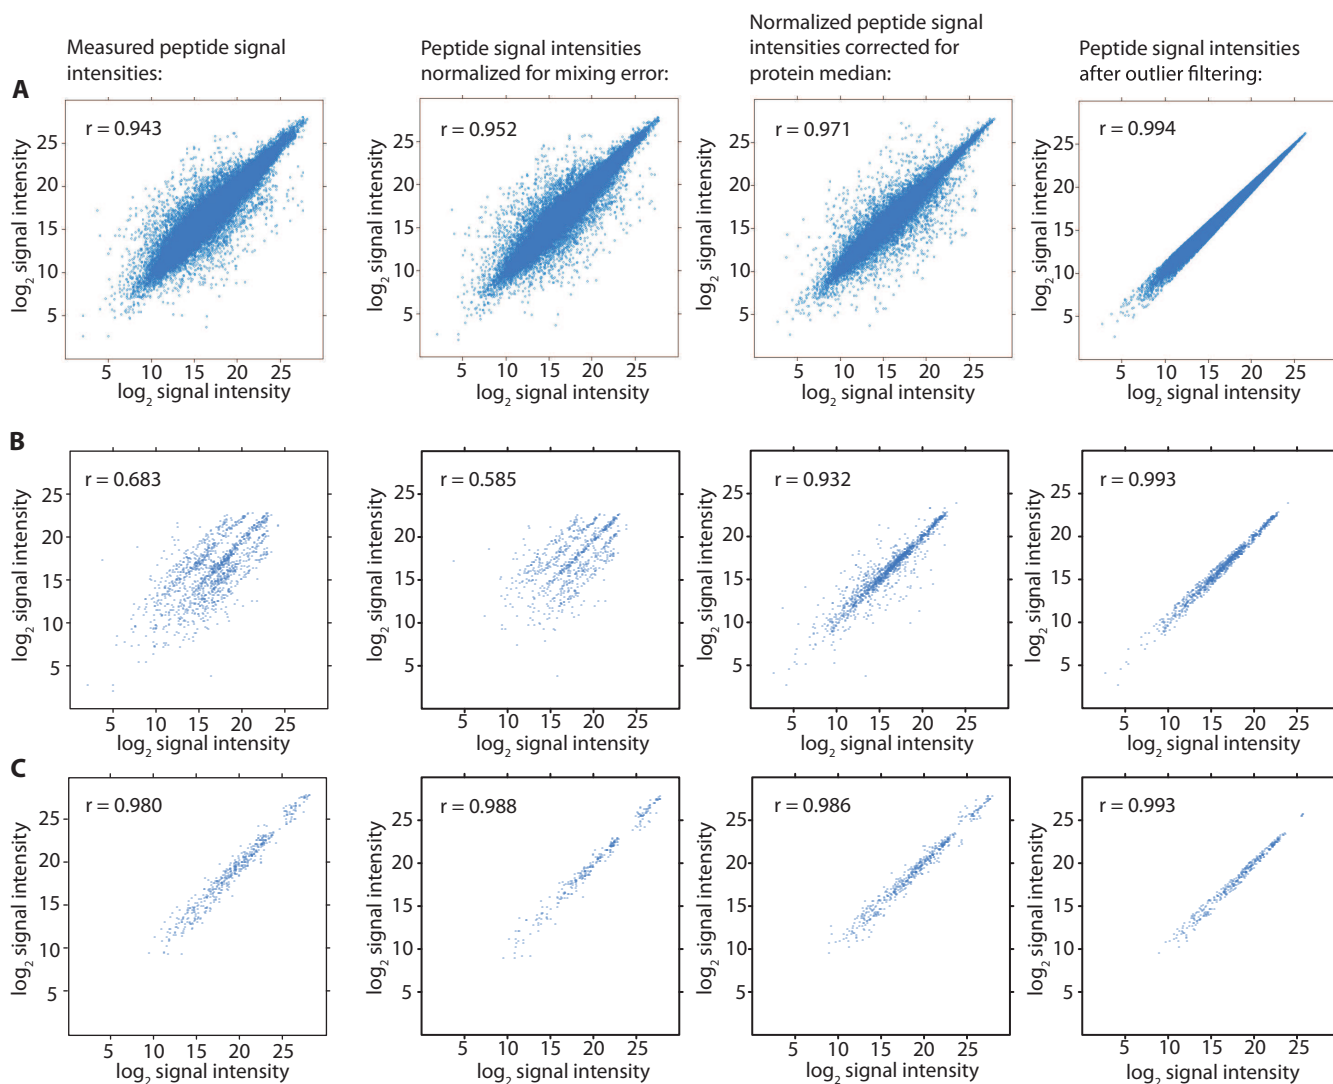

**Supplementary Figure 10 | The effect of the peptide signal intensity normalizations in each step during the outlier detection is shown with the help of three examples.** The signal intensities of all analyzed proteome combinations are displayed for all quantified peptides (panel **A**), all peptides originating from the regulated protein Hmw2 (Mpn310, panel **B**) and all the peptides of the not-regulated protein Ef-Tu (Mpn665, panel **C**). In each diagram the Pearson correlation is indicated in the top left corner. For each of these examples in panel **A-C** the diagrams from left to right show the comparison of these signal intensities that were measured, after they were normalized for mixing errors, after correction for protein abundance changes and after outlier removal, respectively. The signal intensities used to determine a particular abundance change are plotted against each other. The signal intensities should therefore be distributed on a diagonal.
